# Supplementary material for: Using experimental gaming simulations to elicit risk mitigation behavioral strategies for agricultural disease management
Source: PLOS journal article supplement (doi:10.1371/journal.pone.0228983), 2020-03-17
Supplement: S1 (10.1371/journal.pone.0228983.s001) [file journal.pone.0228983.s001]

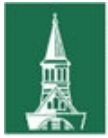

The  
UNIVERSITY  
of VERMONT

Committees on Human Subjects  
Serving the University of Vermont  
and the UVM Medical Center

RESEARCH PROTECTIONS OFFICE  
213 Waterman Building  
85 South Prospect Street  
Burlington, Vermont 05405  
(802)656-5040 ph  
[www.uvm.edu/irb/](http://www.uvm.edu/irb/)

---

## Protocol Exemption Certification

TO: Scott Merrill, Ph. D.  
FROM: Gale Weld, Research Review Analyst, CIP   
DATE OF REVIEW: 14-Apr-2017  
DATE OF AMENDMENT: 13-Apr-2017  
SUBJECT: CHRBSS: 16-232  
A Human Behavioral Approach to Reducing the Impact of Livestock  
Pest or Disease Incursions of Socio-Economic Importance (Part 1)

Thank you for submitting the proposed modification to this exempt project. Following IRB review, it has been determined that the project still qualifies for exemption as indicated below.

### **Exemption Category: 2**

Federal Exemption: "Research involving the use of educational tests (cognitive, diagnostic, aptitude, achievement), survey procedures, interview procedures, or observation of public behavior, unless: (a) information obtained is recorded in such a manner that human subjects can be identified, directly or through identifiers linked to the subjects; and (b) any disclosure of the human subjects' responses outside the research could reasonably place the subjects at risk of criminal or civil liability or be damaging to the subjects' financial standing, employability, or reputation."

**This exemption is effective for the duration of the project UNLESS modifications are made that affect the original determination of exemption.**
