# Supplementary material for: Using experimental gaming simulations to elicit risk mitigation behavioral strategies for agricultural disease management
Source: PLoS One. 2020 Mar 17;15(3):e0228983. doi: 10.1371/journal.pone.0228983 (PMC7077803; doi:10.1371/journal.pone.0228983)
Supplement: S1 Data — A demo of the game is hosted online at: (https://segs.w3.uvm.edu/demos/protocol). (ZIP) [file pone.0228983.s001.zip]

Archive with 3 entries (3 files):
- Amendment .pdf
- Exemption Certification 4_13_17.pdf
- Protocol Exemption Review and Determination.pdf
